# Supplementary material
Source: Springer Nature journal article supplement (https://www.springermedizin.de/resource/supplementary/12916_2010_360_MOESM2_ESM.pdf/9599726)

A.

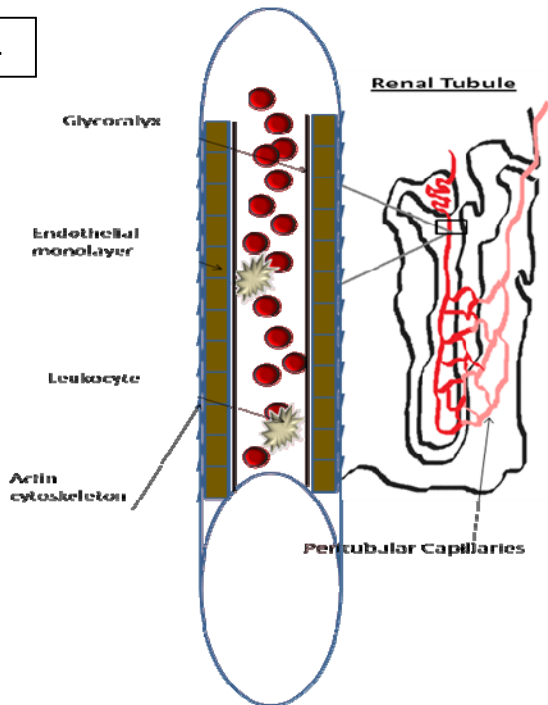

B.

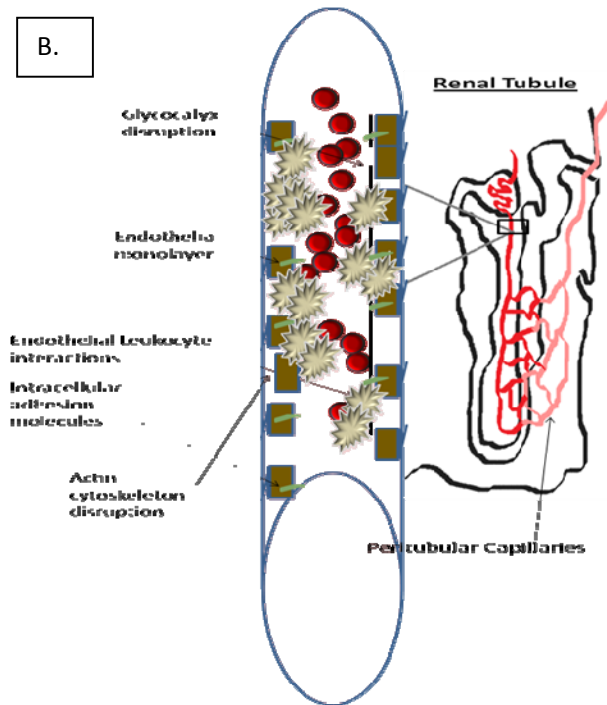

Supplement: MOESM2 [file 9599726]
